# Supplementary material for: Preparation of a mesoporous Cu–Mn/TiO2 composite for the degradation of Acid Red 1
Source: Royal Society of Chemistry journal article supplement (doi:10.1039/c4ta06682k), 2015-01-01

## Supporting information

### **Preparation of mesoporous Cu-Mn/TiO<sub>2</sub> composites for degradation of Acid Red 1**

Hongyang Min,<sup>‡*a*</sup> Xianqiang Ran,<sup>‡*a*</sup> Jianwei Fan,<sup>\**ab*</sup> Yu Sun,<sup>*c*</sup> Jianping Yang,<sup>*ad*</sup> Wei Teng,<sup>\**a*</sup>  
Wei-xian Zhang,<sup>*a*</sup> Guangming Li<sup>*a*</sup> and Dongyuan Zhao<sup>*b*</sup>

<sup>*a*</sup> College of Environmental Science and Engineering, State Key Laboratory of Pollution Control and Resource Reuse, Tongji University, No. 1239, Siping Road, Shanghai 200092, P. R. China.

<sup>*b*</sup> Department of Chemistry, Laboratory of Advanced Materials, Fudan University, Shanghai 200433, P. R. China.

<sup>*c*</sup> Shanghai Tongji Clearon Environmental-Protection Equipment Engineering Co., Ltd, Shanghai 200092, P. R. China.

<sup>*d*</sup> Institute for Superconducting & Electronic Materials, Australian Institute of Innovative Materials, University of Wollongong, Innovation Campus, Squires Way, North Wollongong, NSW 2500, Australia.

\*E-mail address: fanjianwei@tongji.edu.cn (Dr. Jianwei Fan)

wteng@tongji.edu.cn (Dr. Wei Teng)

Tel: +86-21-65982658

Fax: +86-21-65985157

‡ These authors contributed equally to this work.

**Table S1.** The atomic contents and catalytic performance of the mesoporous Cu-Mn/TiO<sub>2</sub> catalysts with different Cu and Mn loadings ( $C_{\text{catalyst}} = 0.6 \text{ g/L}$ ,  $C_{\text{H}_2\text{O}_2} = 126.4 \text{ mM}$ ,  $T = 70 \text{ }^\circ\text{C}$ ,  $\text{PH} = 6.7$ ).

|                          | Decolorization efficiency | Content (wt.%) |      |      |
|--------------------------|---------------------------|----------------|------|------|
|                          | (%)                       | Cu             | Mn   | Ti   |
| L-Cu-Mn/TiO <sub>2</sub> | 89                        | 2.4            | 2.5  | 57.2 |
| Cu-Mn/TiO <sub>2</sub>   | 99                        | 5.7            | 6.0  | 50.6 |
| H-Cu-Mn/TiO <sub>2</sub> | 24                        | 9.7            | 10.1 | 45.0 |

**Table S2.** Compounds identified by LC-MS during the degradation of Acid Rea 1 by AOPs.

| Number | Molecular formula                                                                   | <i>m/z</i> |
|--------|-------------------------------------------------------------------------------------|------------|
| 1      | 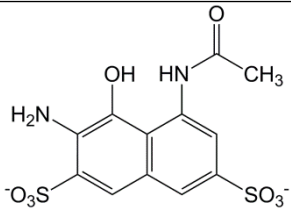   | 374        |
| 2      |    | 332        |
| 3      |    | 302        |
| 4      |   | 292        |
| 5      |  | 182        |

**Fig. S1.** Reusability study of mesoporous Cu-Mn/TiO<sub>2</sub> catalyst ( $C_{\text{catalyst}} = 1.0 \text{ g/L}$ ,  $C_{\text{H}_2\text{O}_2} = 126.4 \text{ mM}$ ,  $T = 70 \text{ }^\circ\text{C}$ ,  $\text{PH} = 6.7$ ).

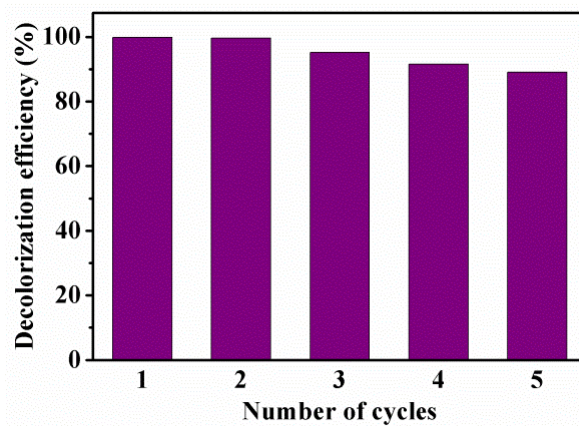

**Fig. S2.** Effect of initial pH ( $C_{\text{catalyst}} = 0.6 \text{ g/L}$ ,  $C_{\text{H}_2\text{O}_2} = 126.4 \text{ mM}$ ,  $T = 70 \text{ }^\circ\text{C}$ ) (A), catalyst dosage ( $C_{\text{H}_2\text{O}_2} = 126.4 \text{ mM}$ ,  $T = 70 \text{ }^\circ\text{C}$ ,  $\text{pH} = 6.7$ ) (B),  $\text{H}_2\text{O}_2$  concentration ( $C_{\text{catalyst}} = 0.6 \text{ g/L}$ ,  $T = 70 \text{ }^\circ\text{C}$ ,  $\text{pH} = 6.7$ ) (C) and reaction temperature ( $C_{\text{catalyst}} = 0.6 \text{ g/L}$ ,  $C_{\text{H}_2\text{O}_2} = 126.4 \text{ mM}$ ,  $\text{pH} = 6.7$ ) (D) on the degradation of Acid Red 1 solution by using the mesoporous Cu-Mn/TiO<sub>2</sub> as a catalyst.

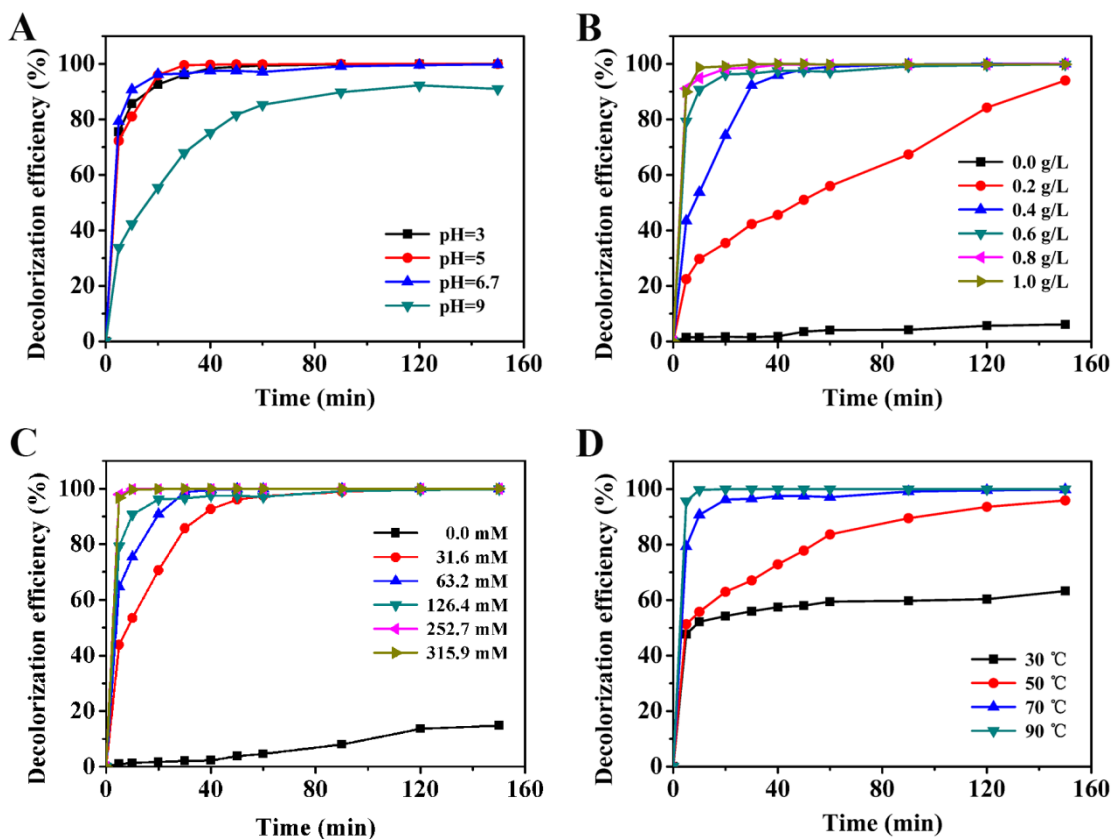

**Fig. S3.** The pseudo-first order exponential relationship for reaction kinetic curve ( $C_{\text{catalyst}} = 0.6 \text{ g/L}$ ,  $C_{\text{H}_2\text{O}_2} = 126.4 \text{ mM}$ ,  $T = 70 \text{ }^\circ\text{C}$ ,  $\text{pH} = 6.7$ ).

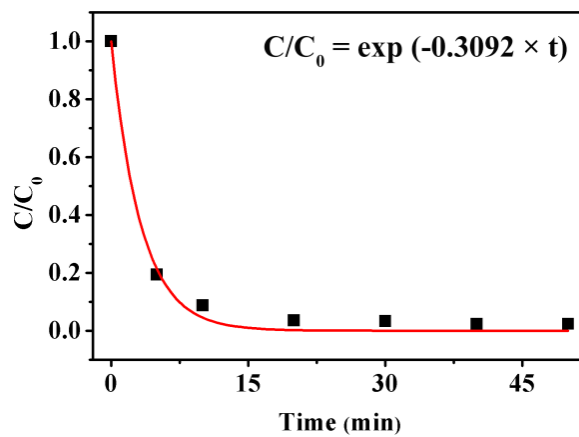

**Fig. S4.** Arrhenius plot for the pseudo-first order kinetic constant of the model.

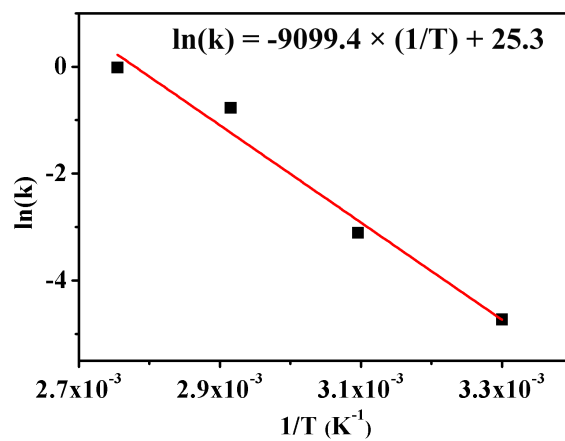

**Fig. S5.** SEM image of bulk Cu-Mn oxide prepared by calcination at 450 °C for 5 h.

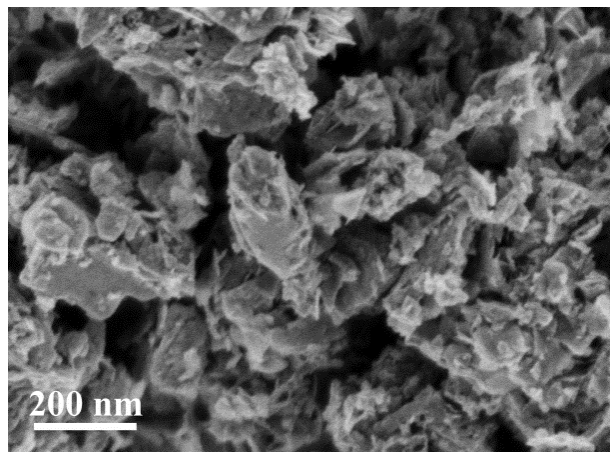



**Fig. S6.** SEM image of Cu-Mn/P25 prepared via wet-impregnation and calcination at 450 °C for 5 h.

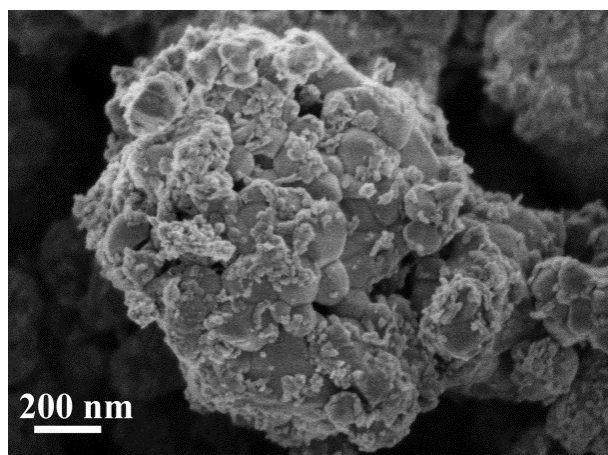

**Fig. S7.** SEM image of Cu-Mn/SBA-15 prepared via wet-impregnation and calcination at 450 °C for 5 h.

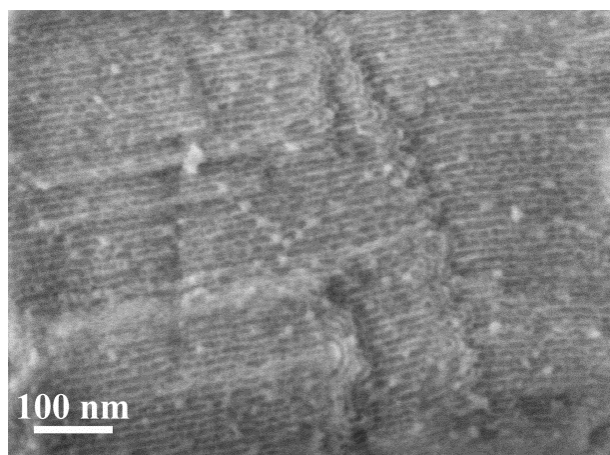

Supplement: c4ta06682k1.pdf [file c4ta06682k1.pdf]
